# Supplementary figures and images for: Personalized Bilateral Upper Limb Essential Tremor Therapy with Botulinum Toxin Using Kinematics
Source: MDPI journal article supplement (doi:10.3390/toxins11020125), 2019-02-19

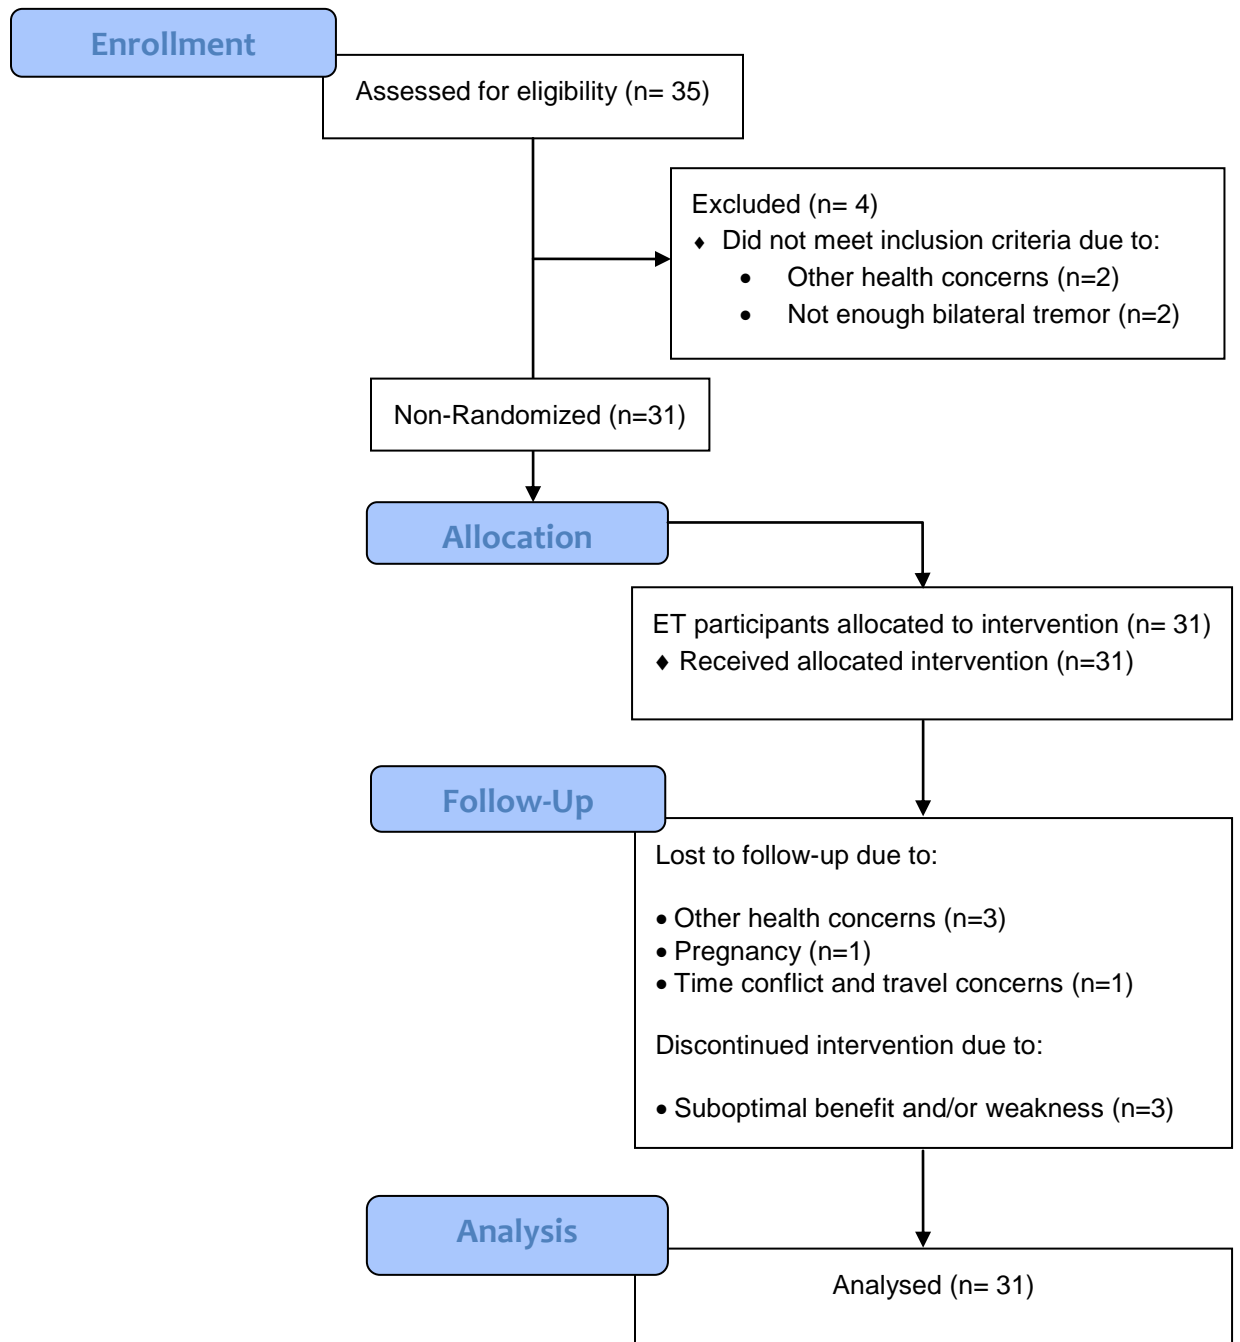

Supplement: s1 [file s1]
